# Supplementary material for: Karyotypic Determinants of Chromosome Instability in Aneuploid Budding Yeast
Source: PubMed Central journal article supplement (PMC3355078; doi:10.1371/journal.pgen.1002719), 2012-05-17
Supplement: pgen.1002719.s003.pdf [file pgen.1002719.s003.pdf]

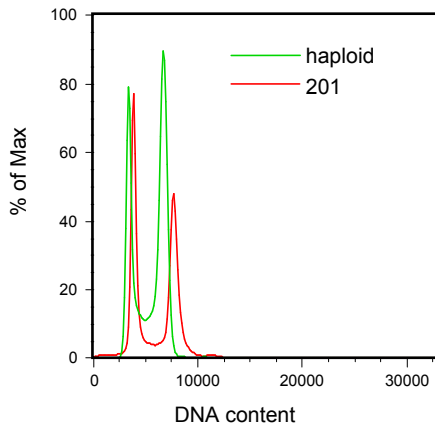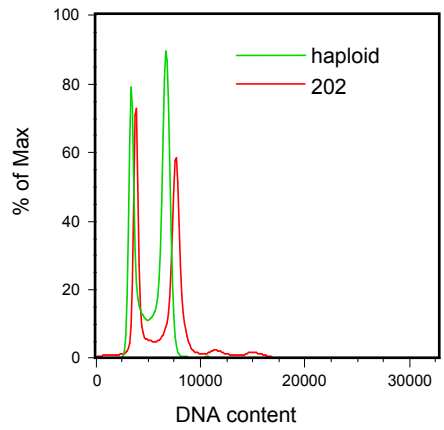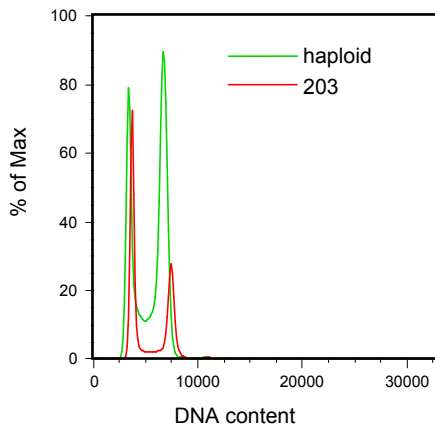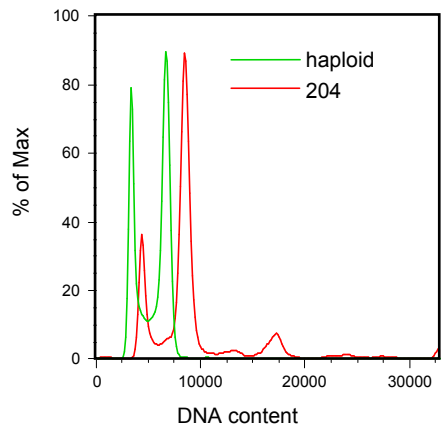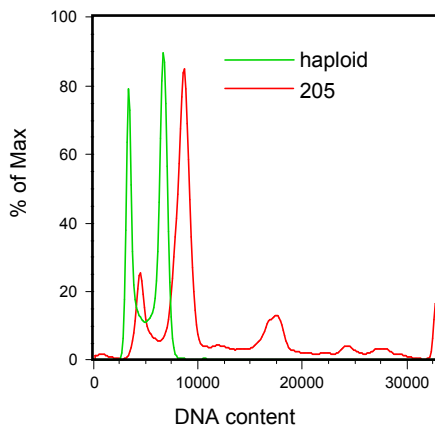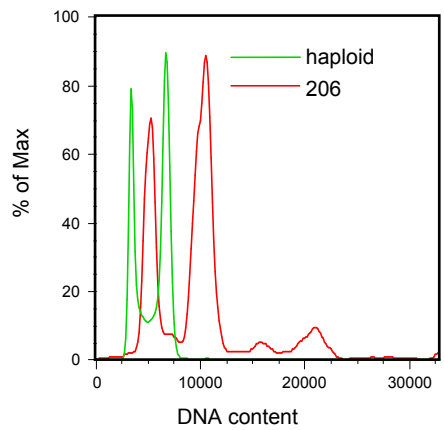

Figure S3 (page 1)

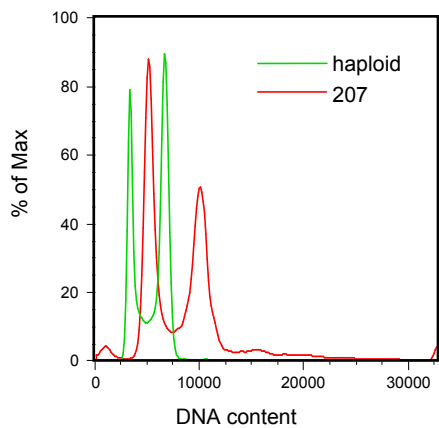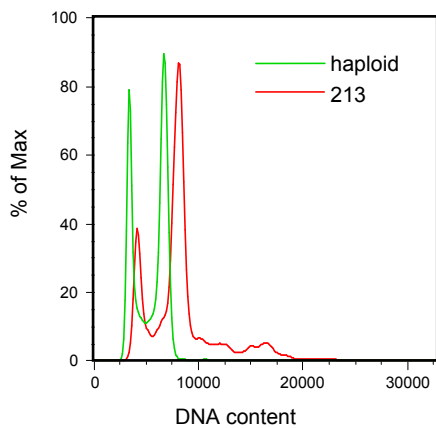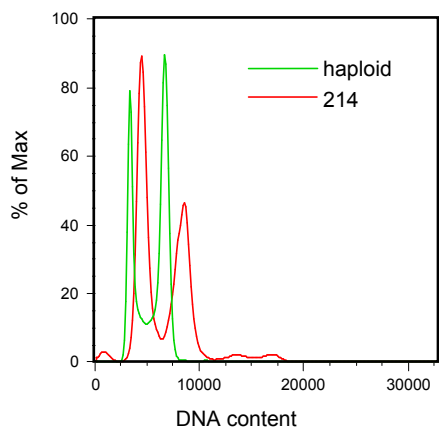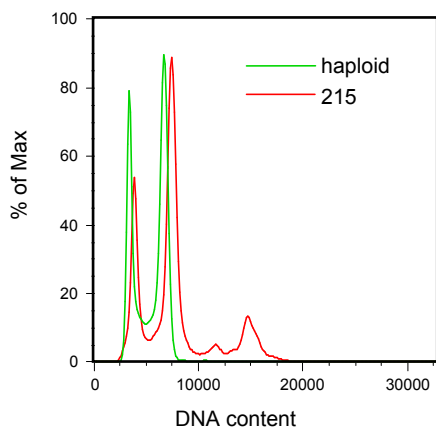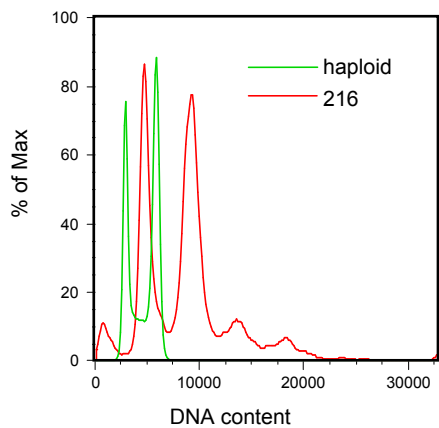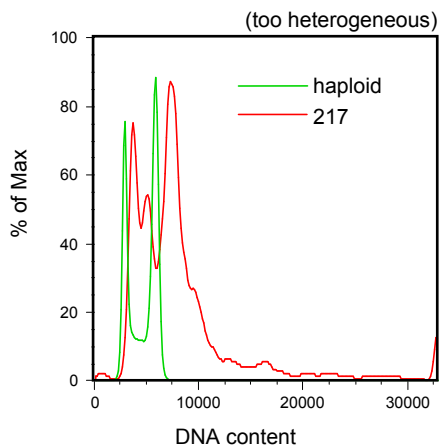

Figure S3 (page 2)

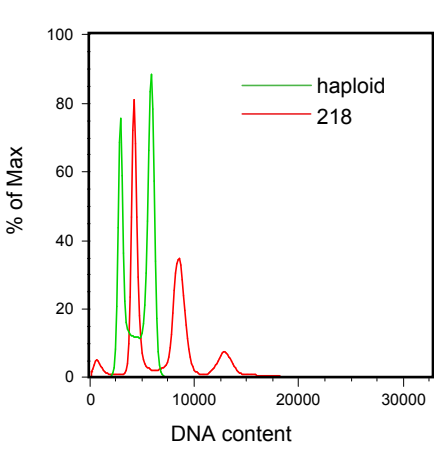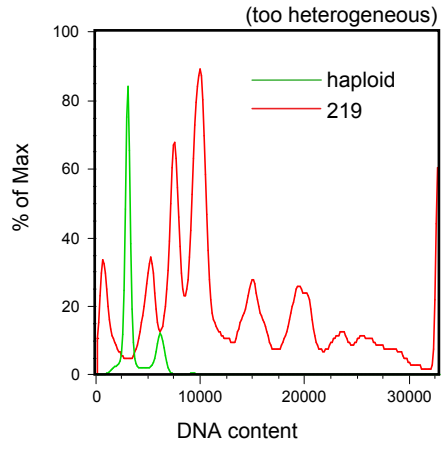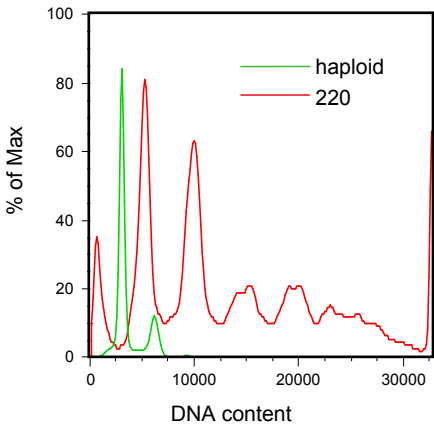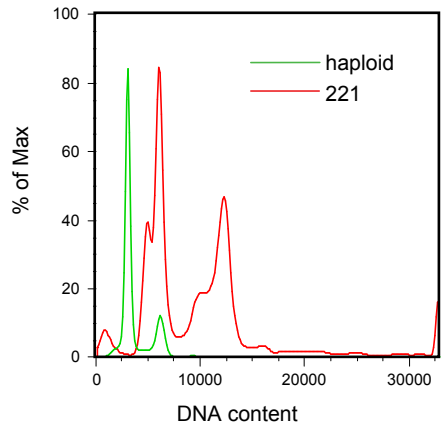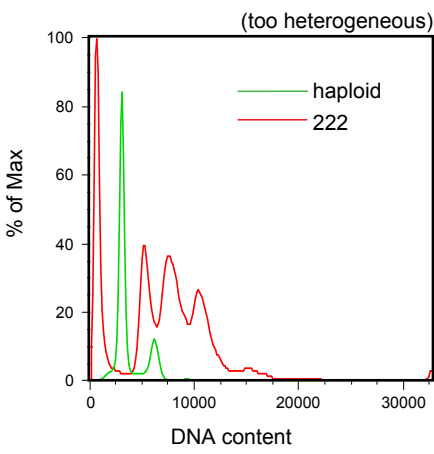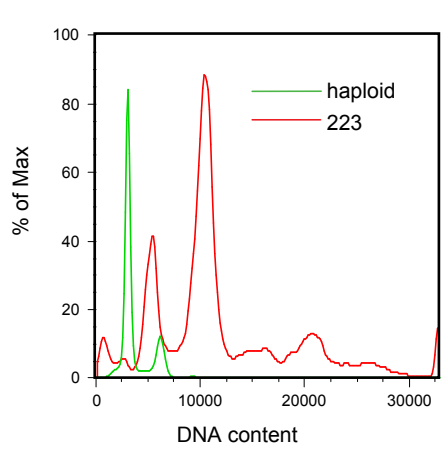

Figure S3 (page 3)

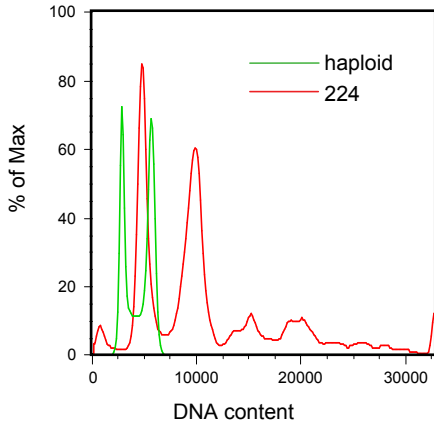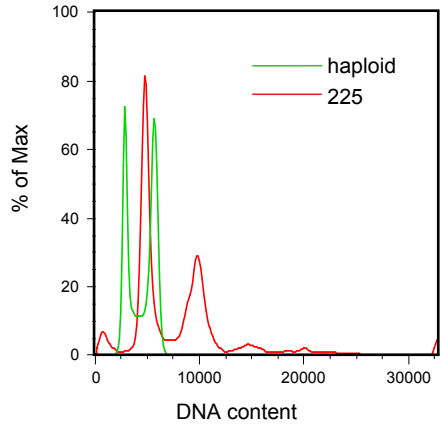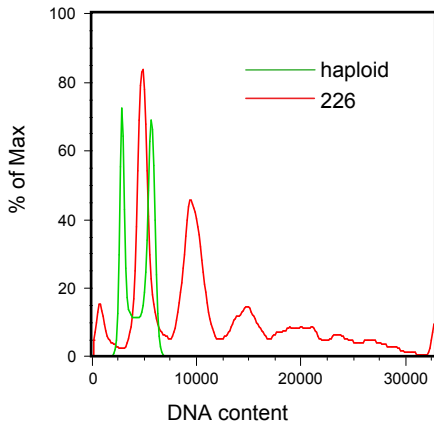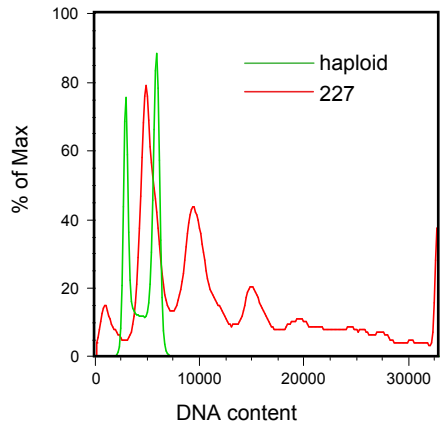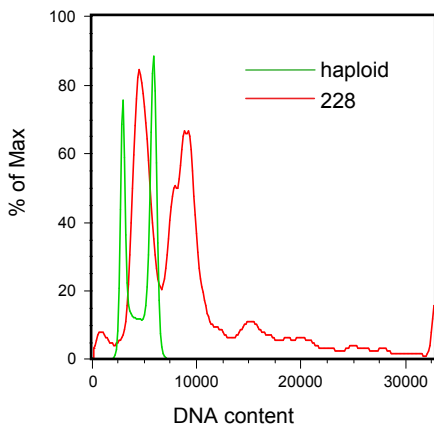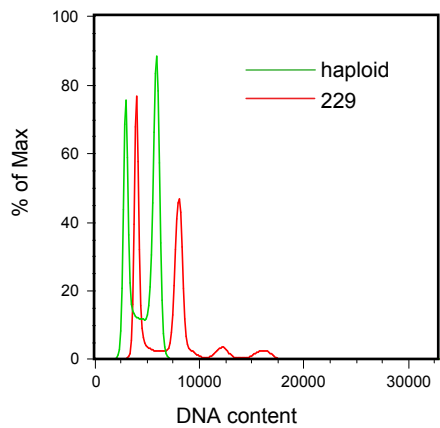

Figure S3 (page 4)

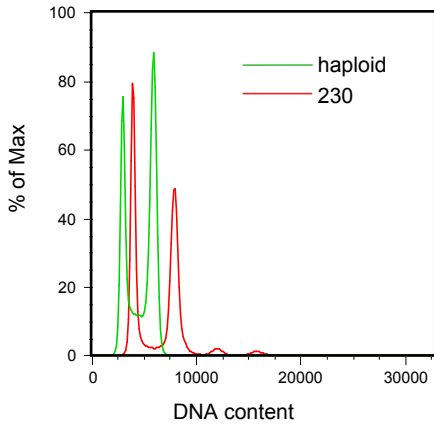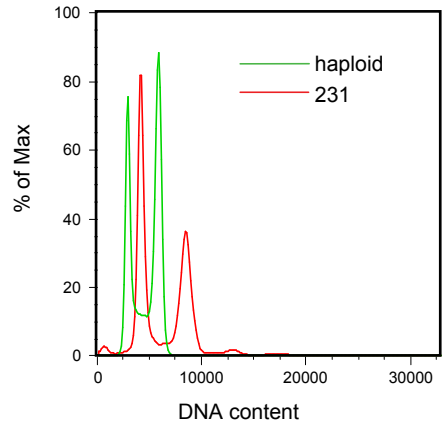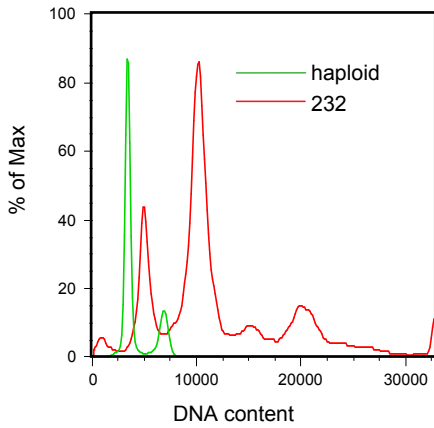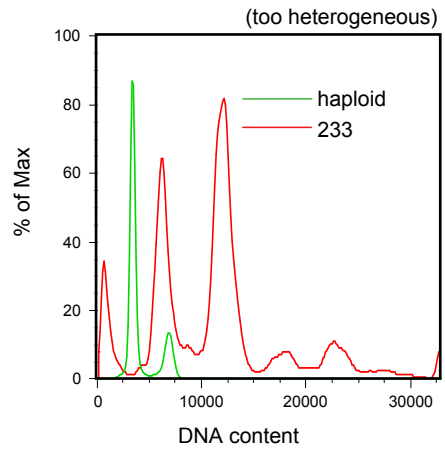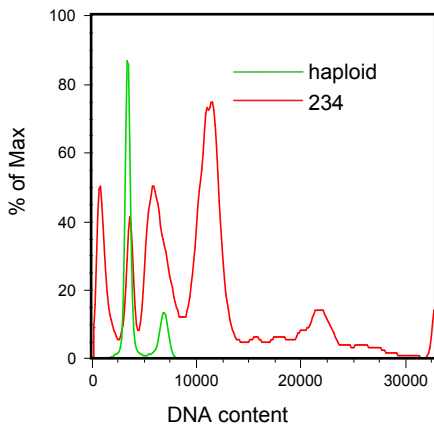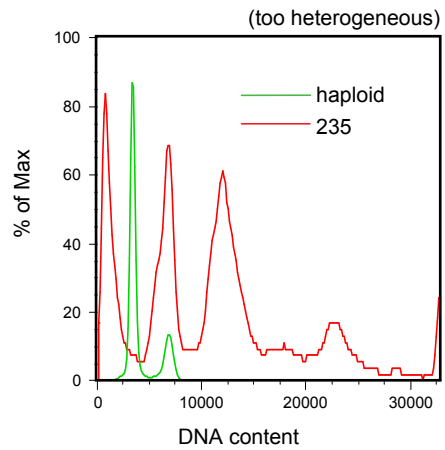

Figure S3 (page 5)

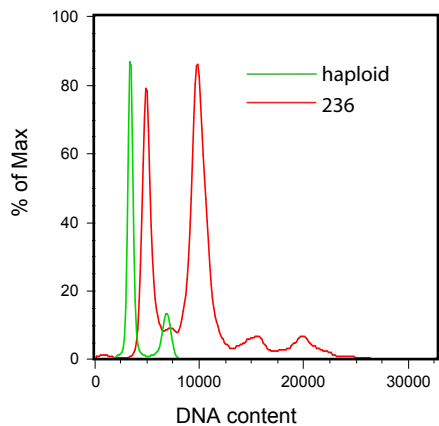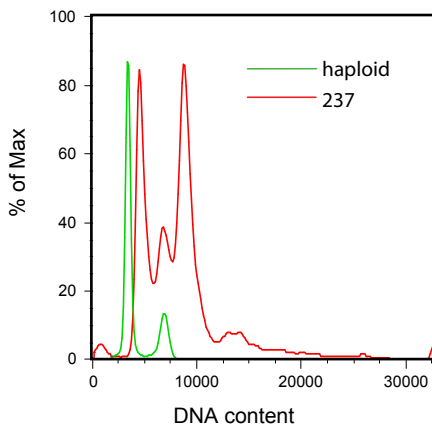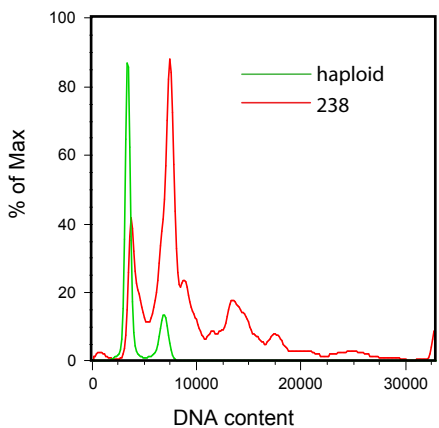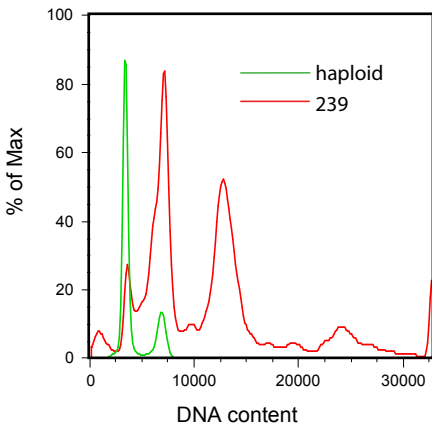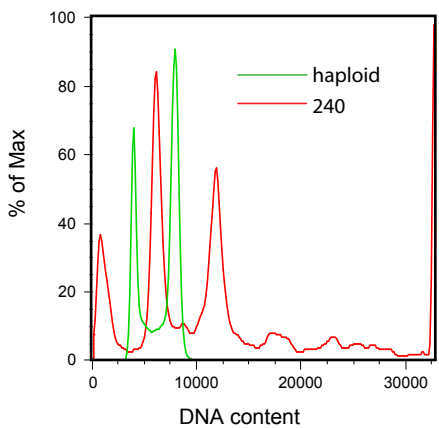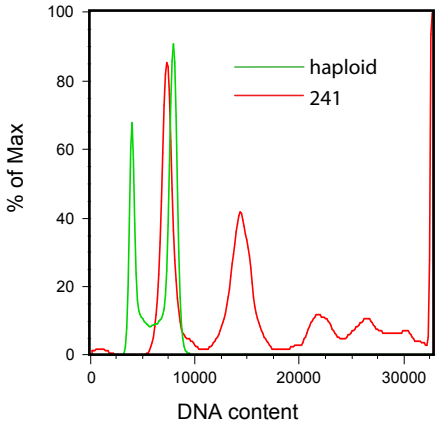

Figure S3 (page 6)

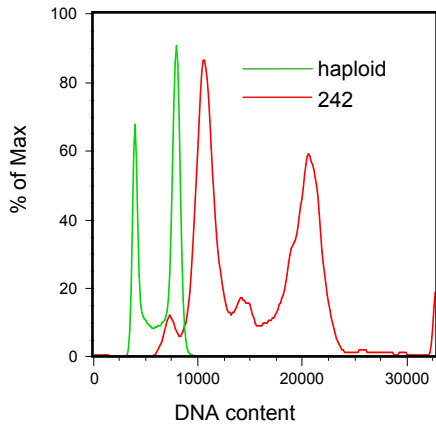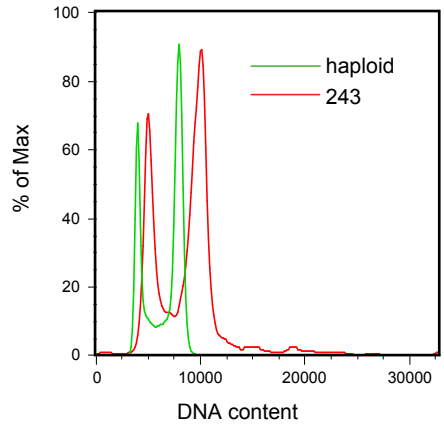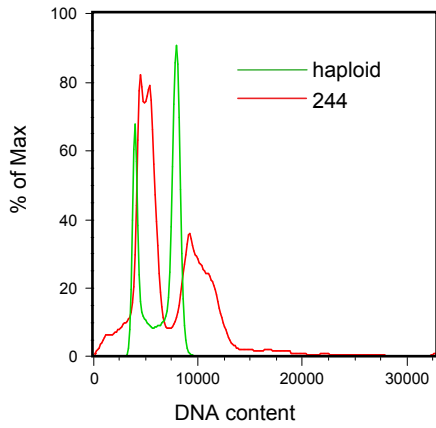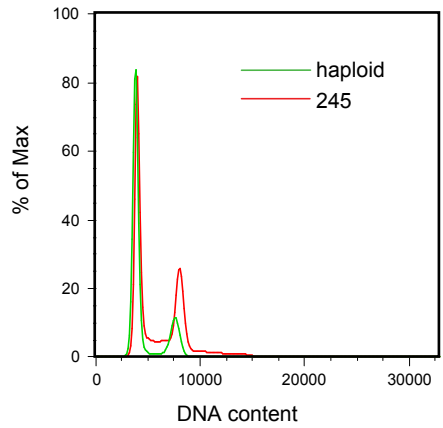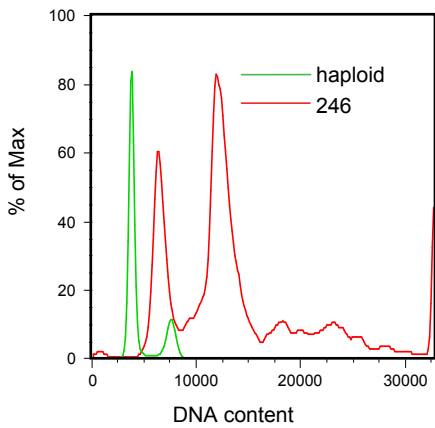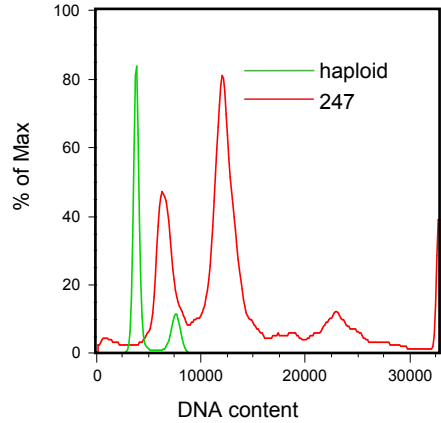

Figure S3 (page 7)

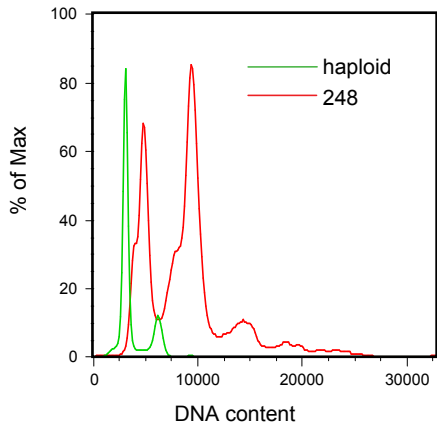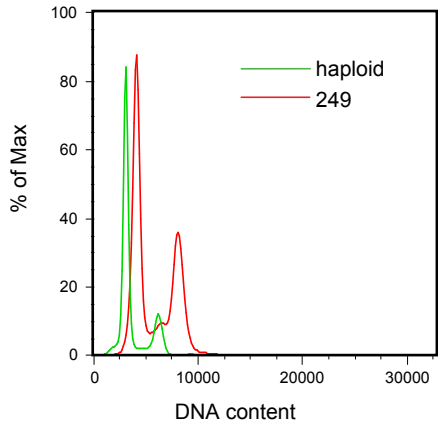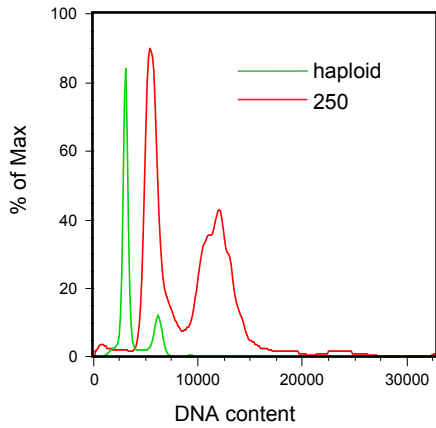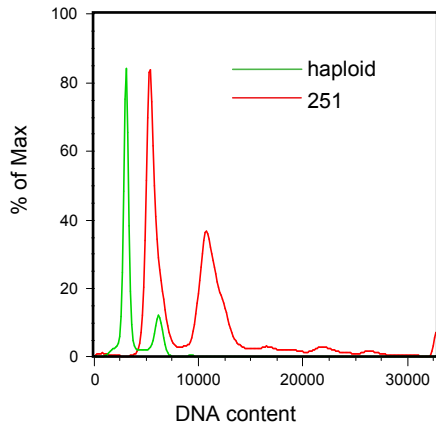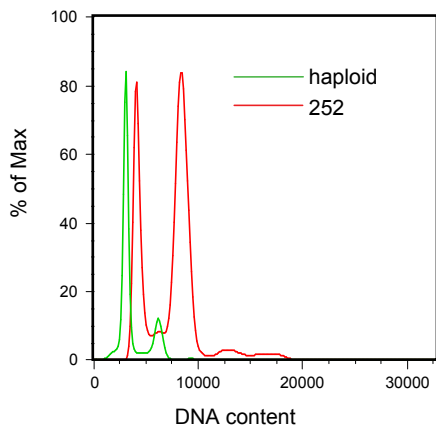

Figure S3 (page 8)
