# Supplementary material for: Karyotypic Determinants of Chromosome Instability in Aneuploid Budding Yeast
Source: PubMed Central journal article supplement (PMC3355078; doi:10.1371/journal.pgen.1002719), 2012-05-17
Supplement: pgen.1002719.s005.pdf [file pgen.1002719.s005.pdf]

**201 (identical to 202)**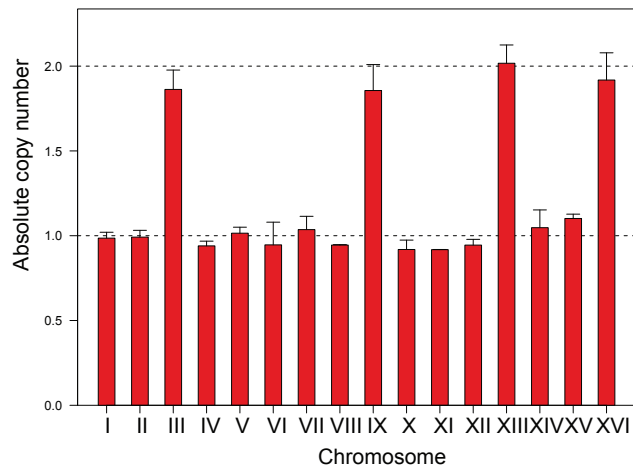**202**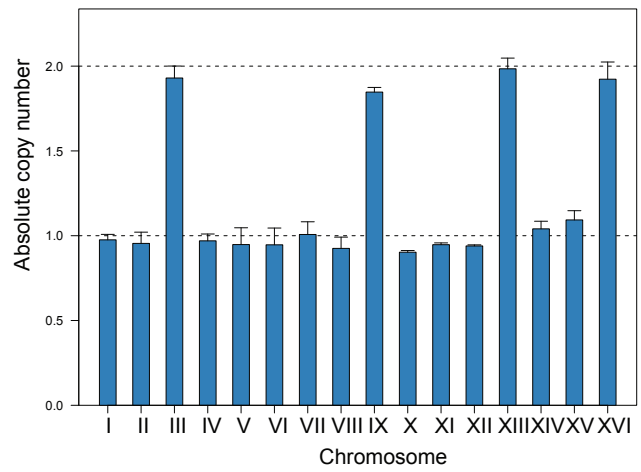**203**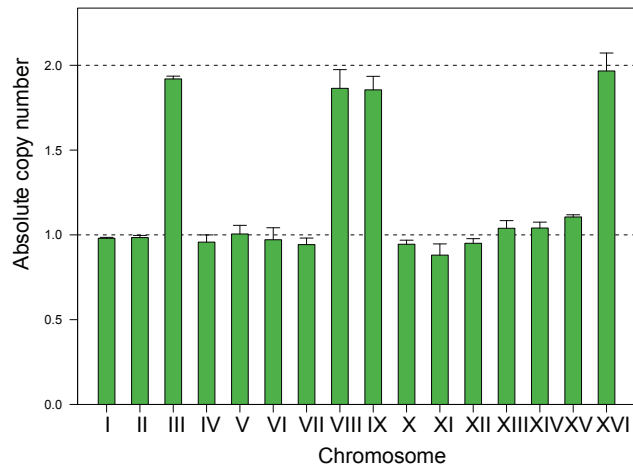**204 (identical to 205)**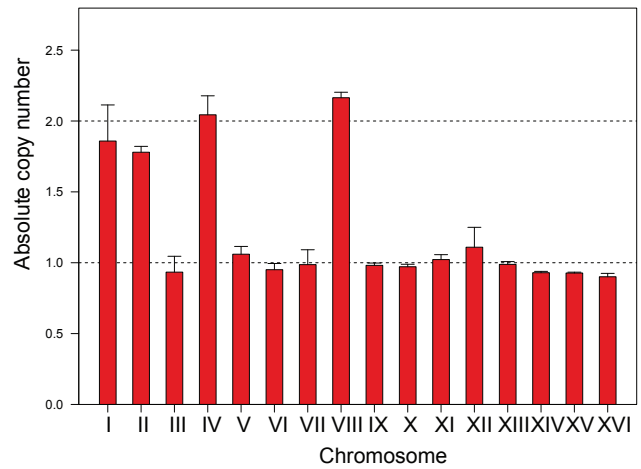**205**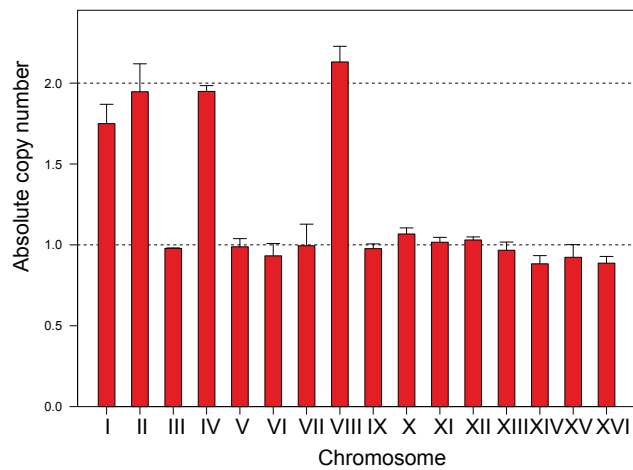**206**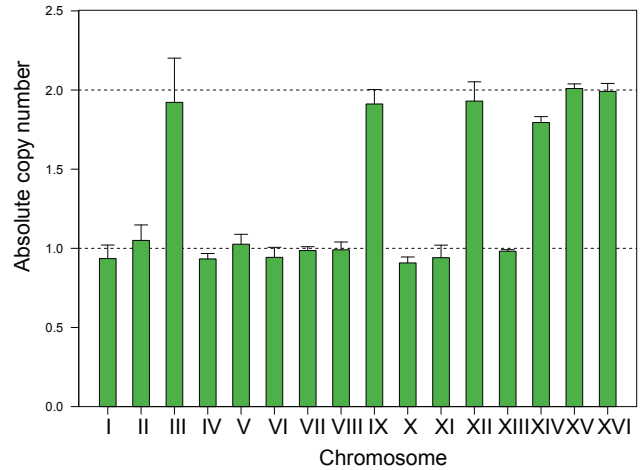

**207**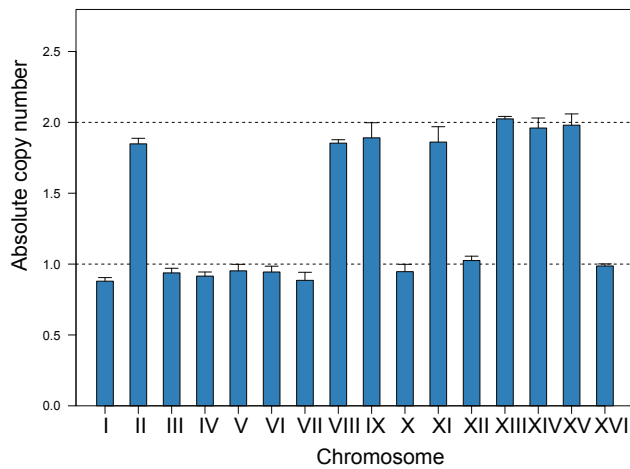**213**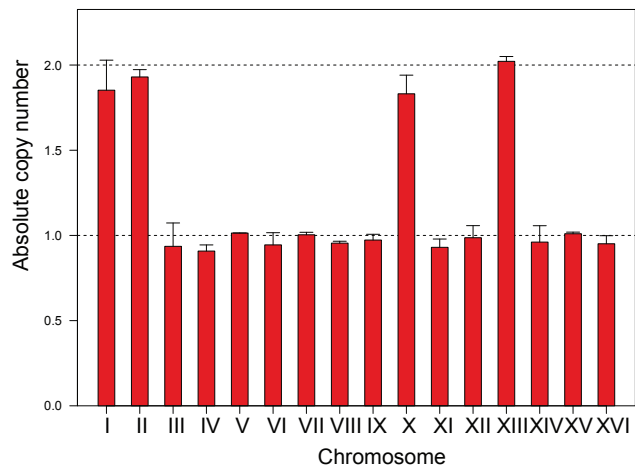**214**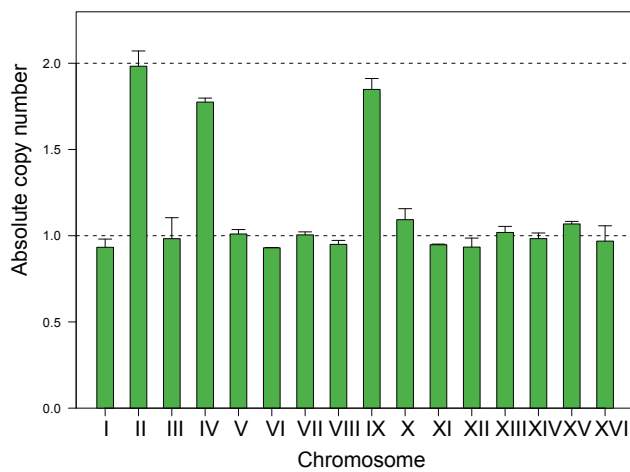**215**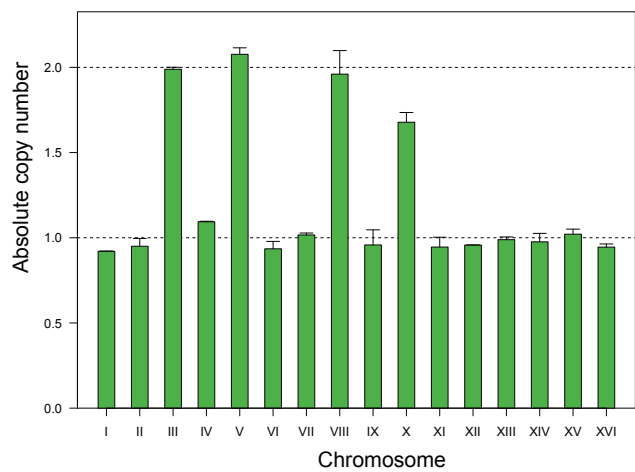**216 (identical to 207)**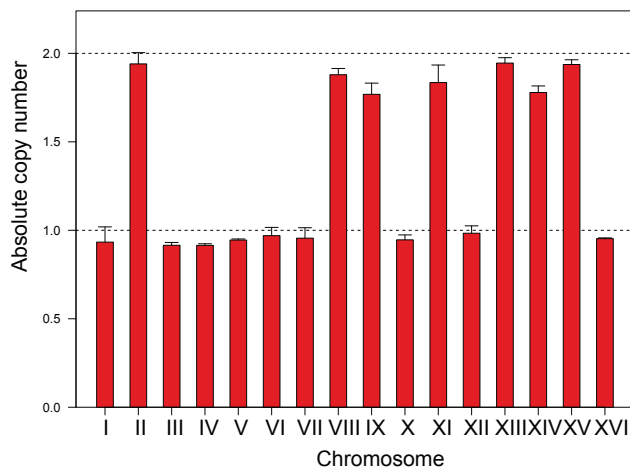**218 (identical to 231)**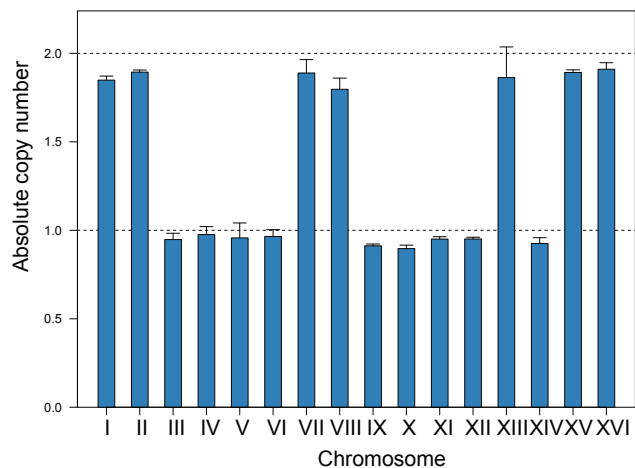

**220**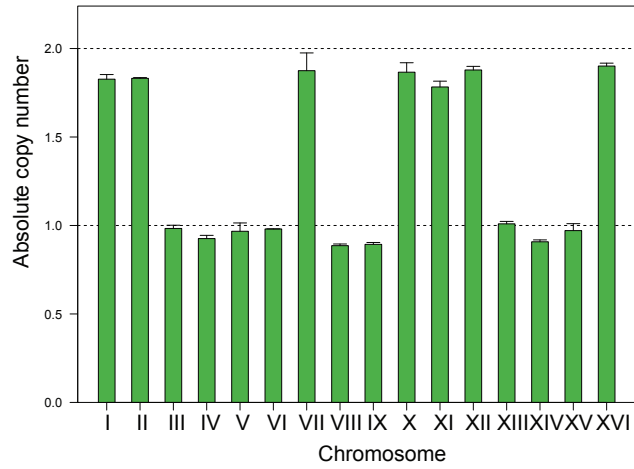**221 (too heterogeneous)**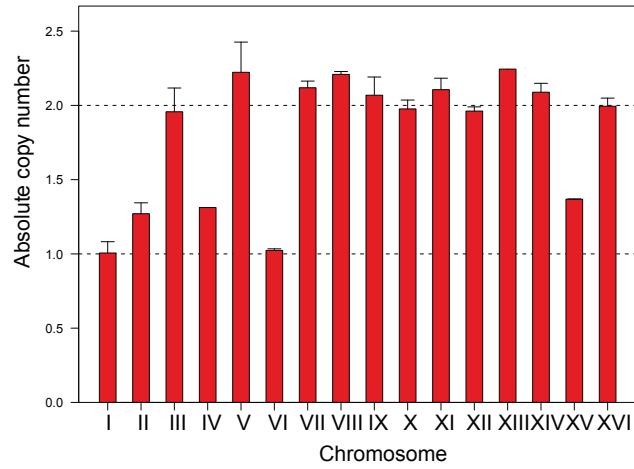**223**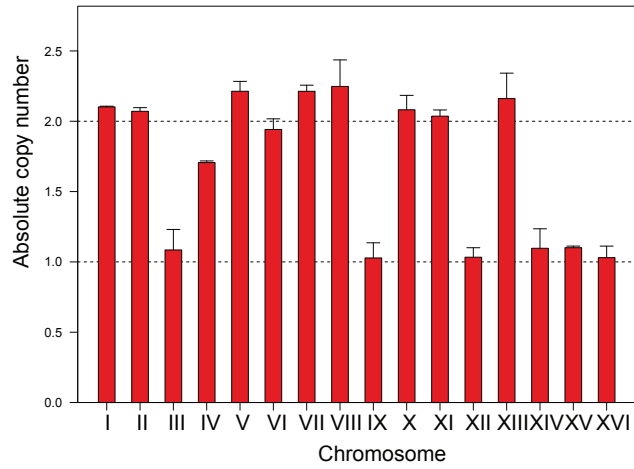**224 (identical to 225)**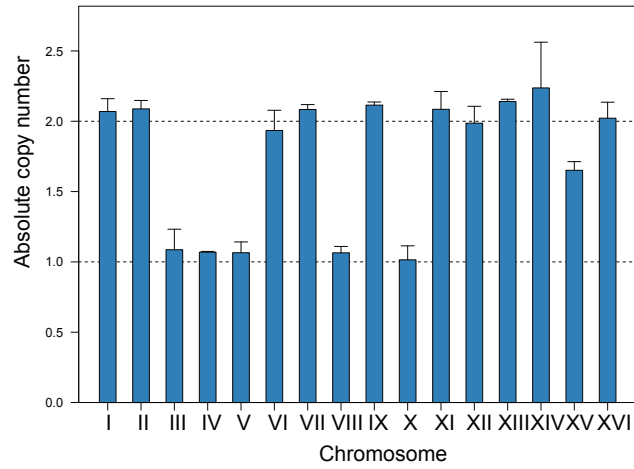**225**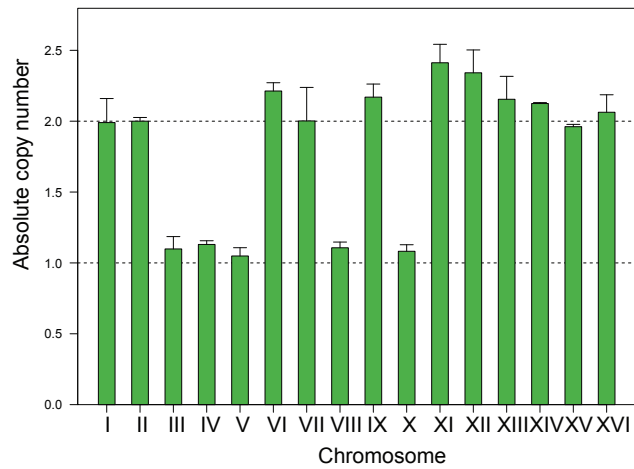**226**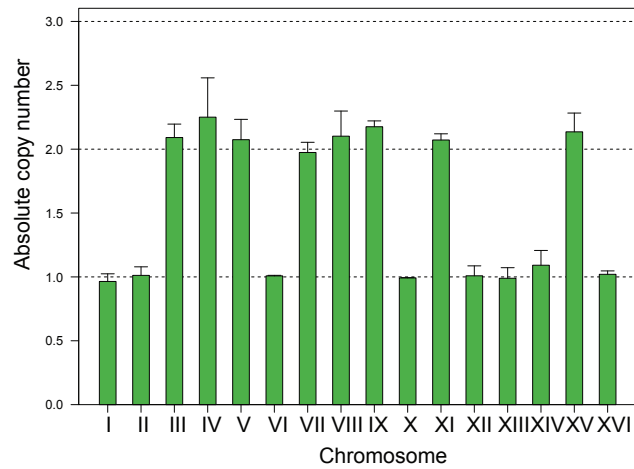

227

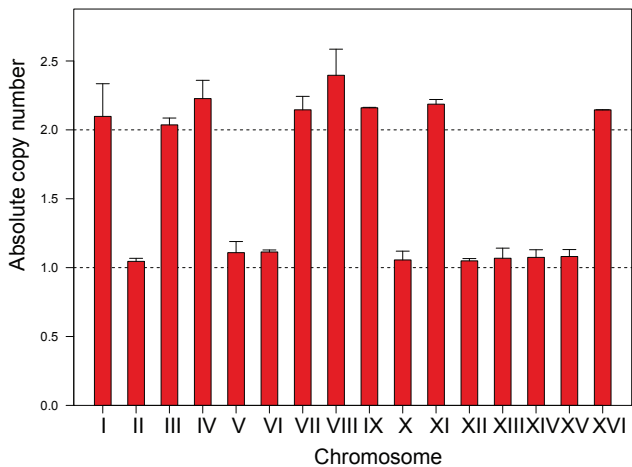

228

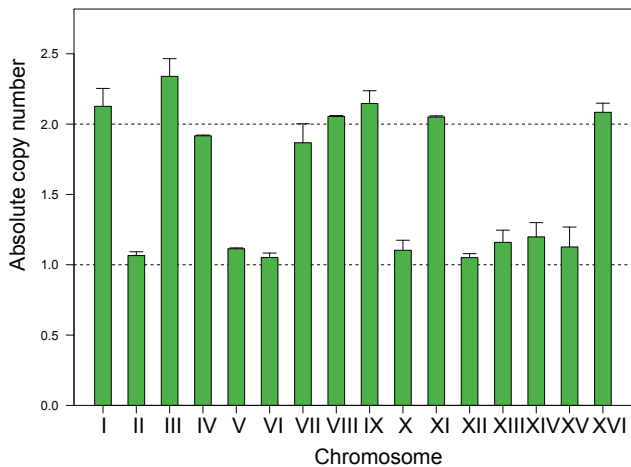

229 (identical to 230)

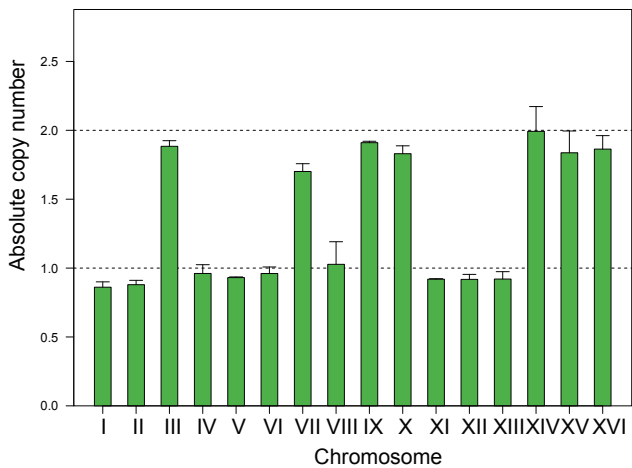

230

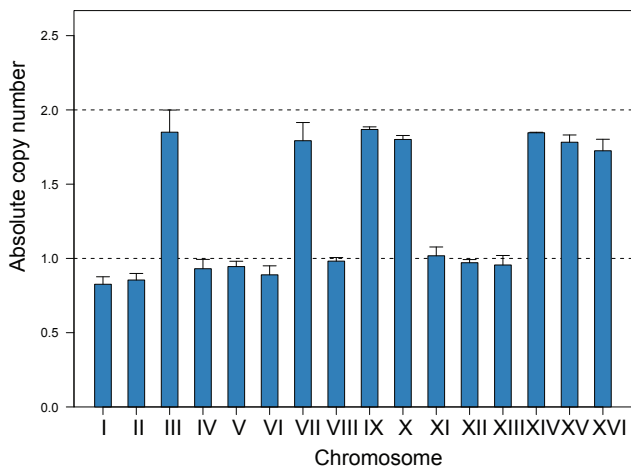

231 (contaminated)

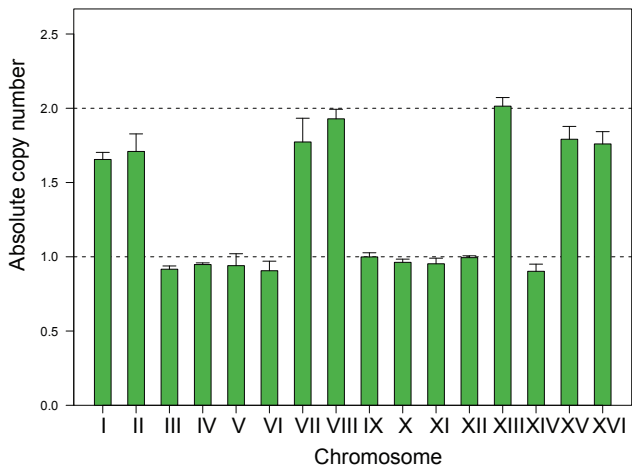

232

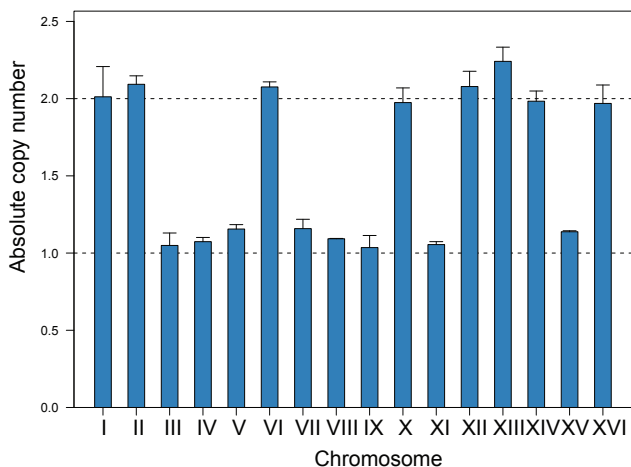

Figure S5 (page 4)

**233**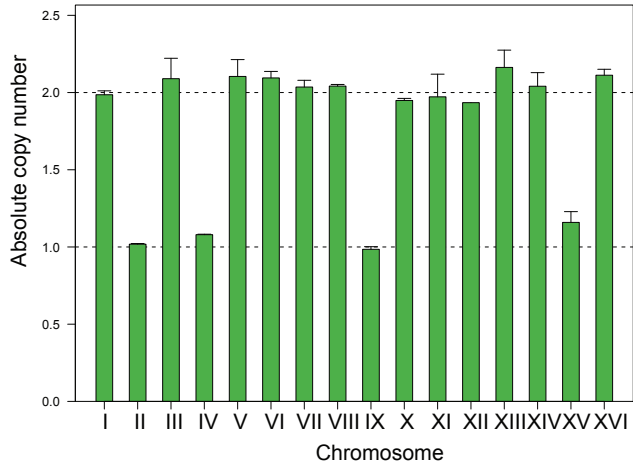**236**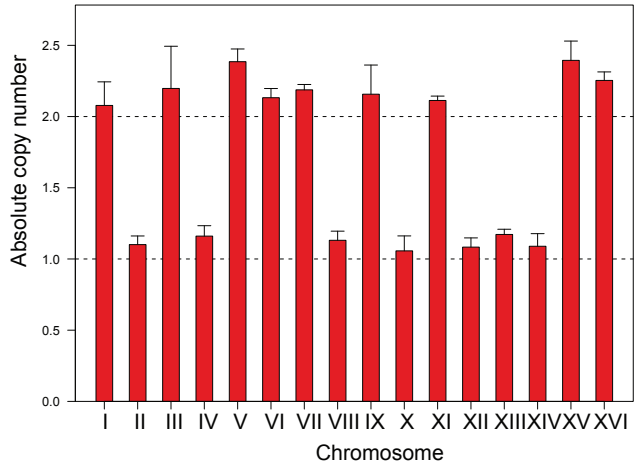**237 (too heterogeneous)**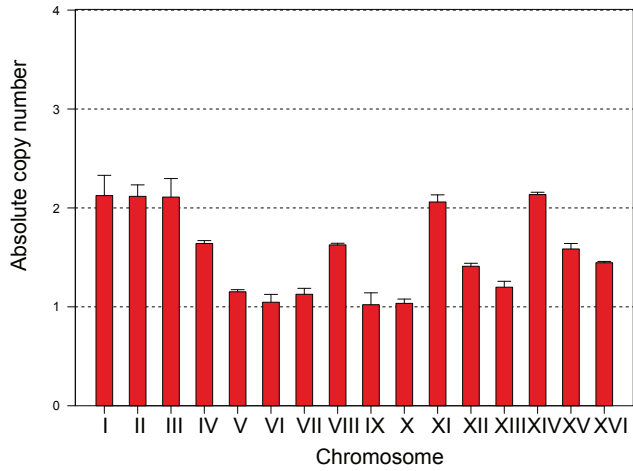**238 (too heterogeneous)**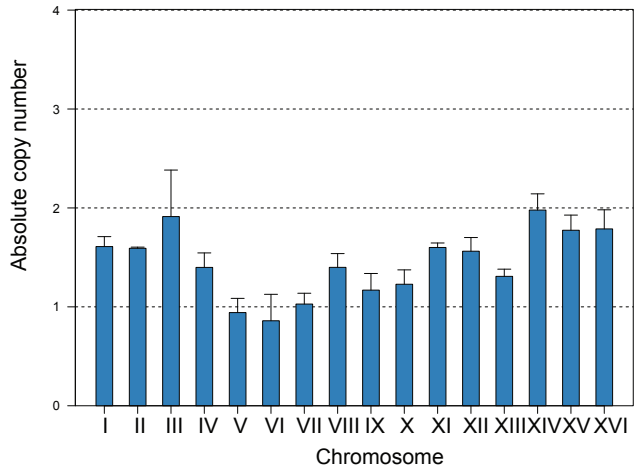**239**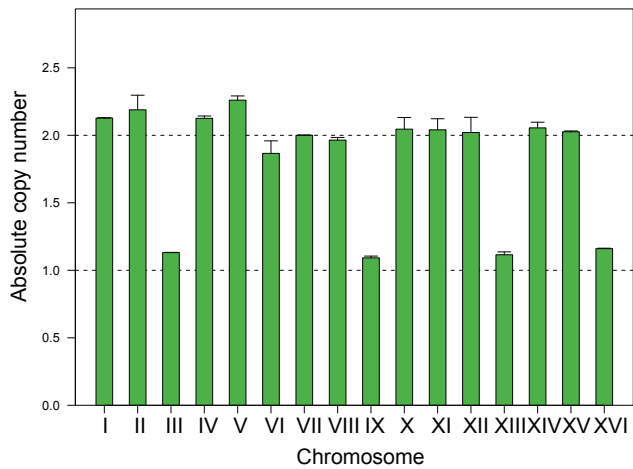**240**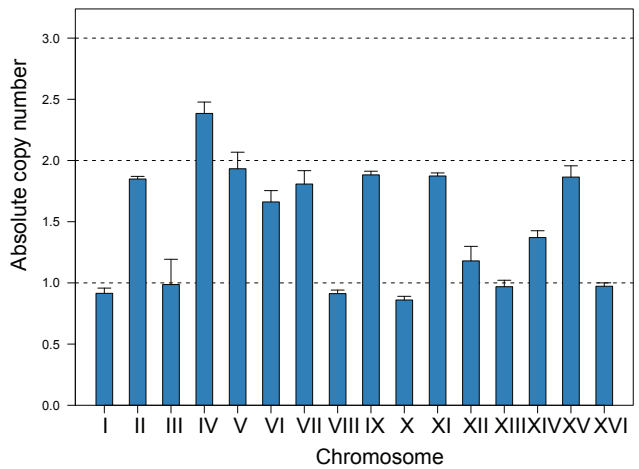

**241**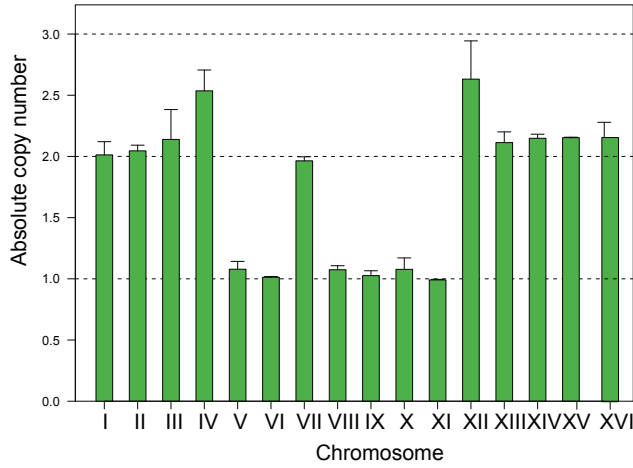**243**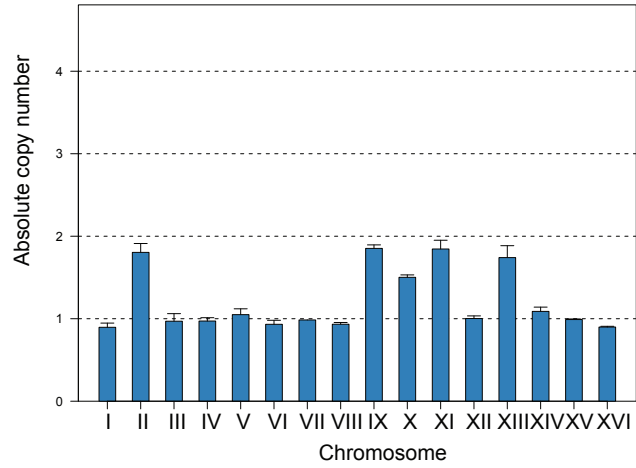**244 (too heterogeneous)**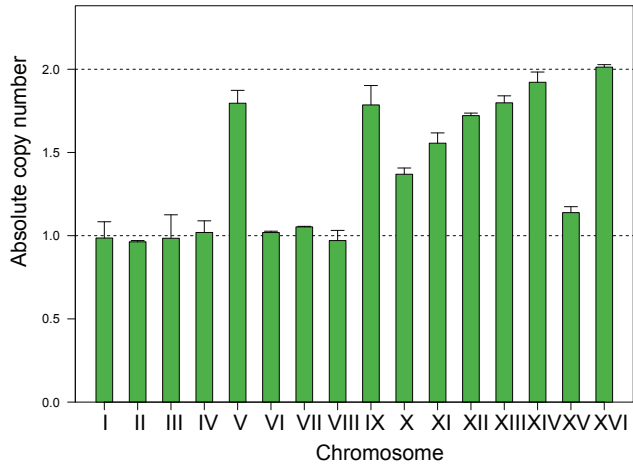**245**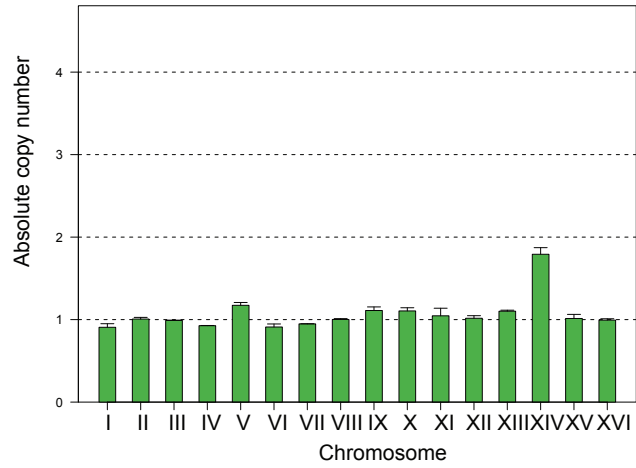**246\_pop (identical to 247)**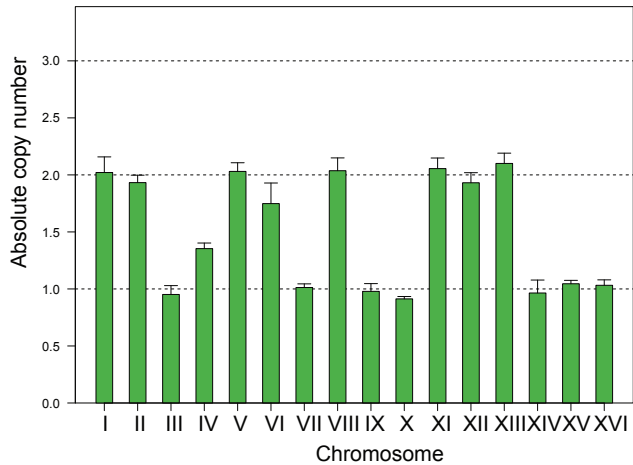**247**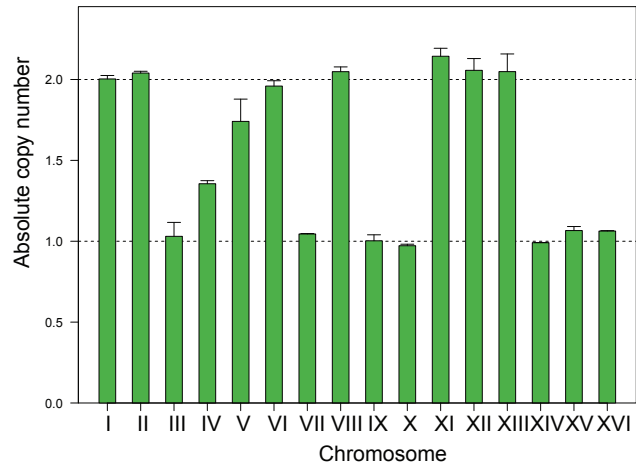

**248 (too heterogeneous)**

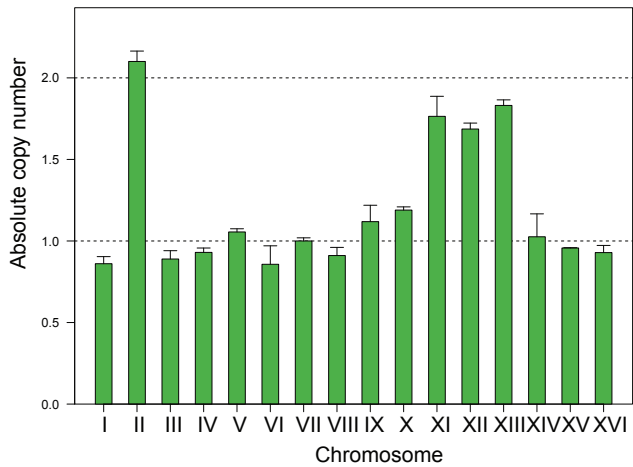

**249**

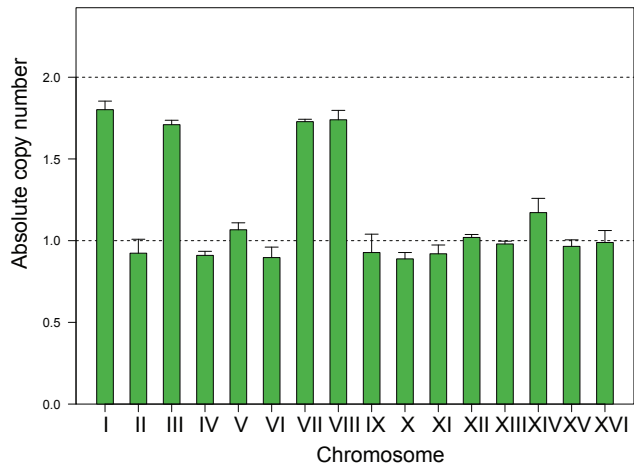

**250 (very similar to 251)**

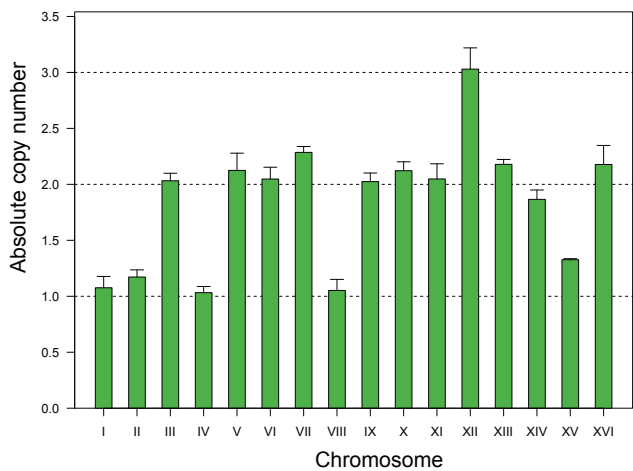

**251**

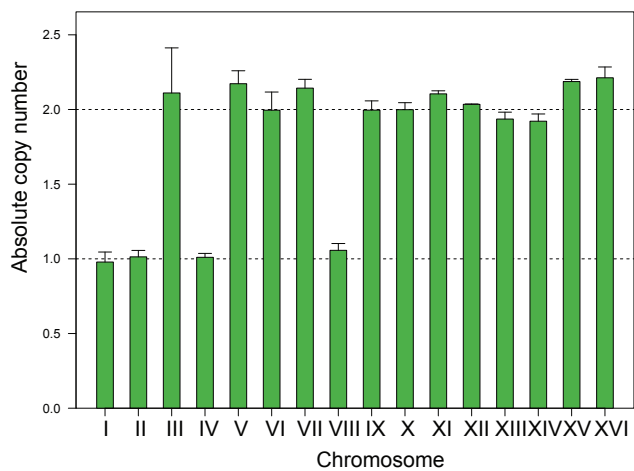

**252**

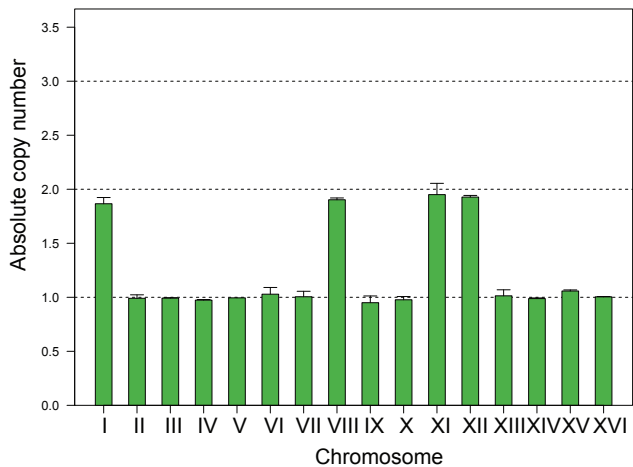

**Figure S5 (page 7)**
