# Supplementary material for: Karyotypic Determinants of Chromosome Instability in Aneuploid Budding Yeast
Source: PubMed Central journal article supplement (PMC3355078; doi:10.1371/journal.pgen.1002719), 2012-05-17
Supplement: pgen.1002719.s006.pdf [file pgen.1002719.s006.pdf]

**A** haploid G1 peak CV=2.30%

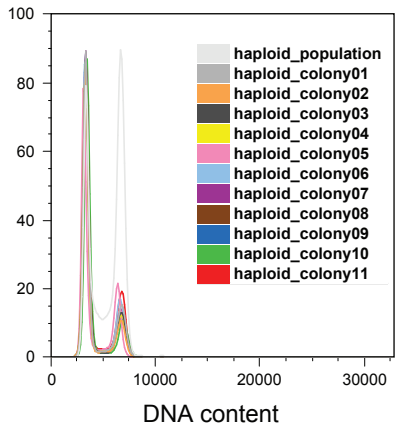

**B** Strain 203 G1 peak CV=3.67%

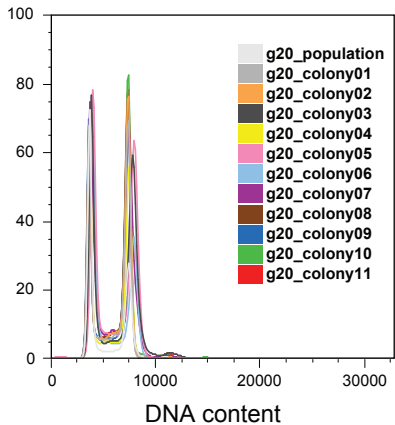

**C** Strain 236 G1 peak CV=29.27%

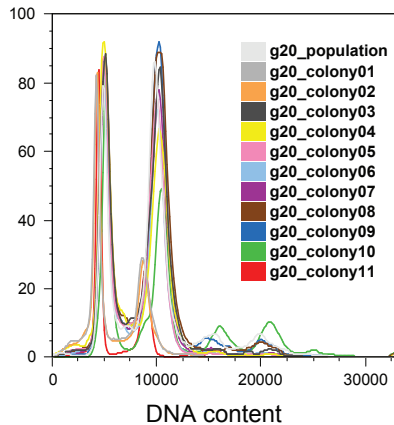

**Figure S6**
