# Supplementary material for: Karyotypic Determinants of Chromosome Instability in Aneuploid Budding Yeast
Source: PubMed Central journal article supplement (PMC3355078; doi:10.1371/journal.pgen.1002719), 2012-05-17
Supplement: pgen.1002719.s007.pdf [file pgen.1002719.s007.pdf]

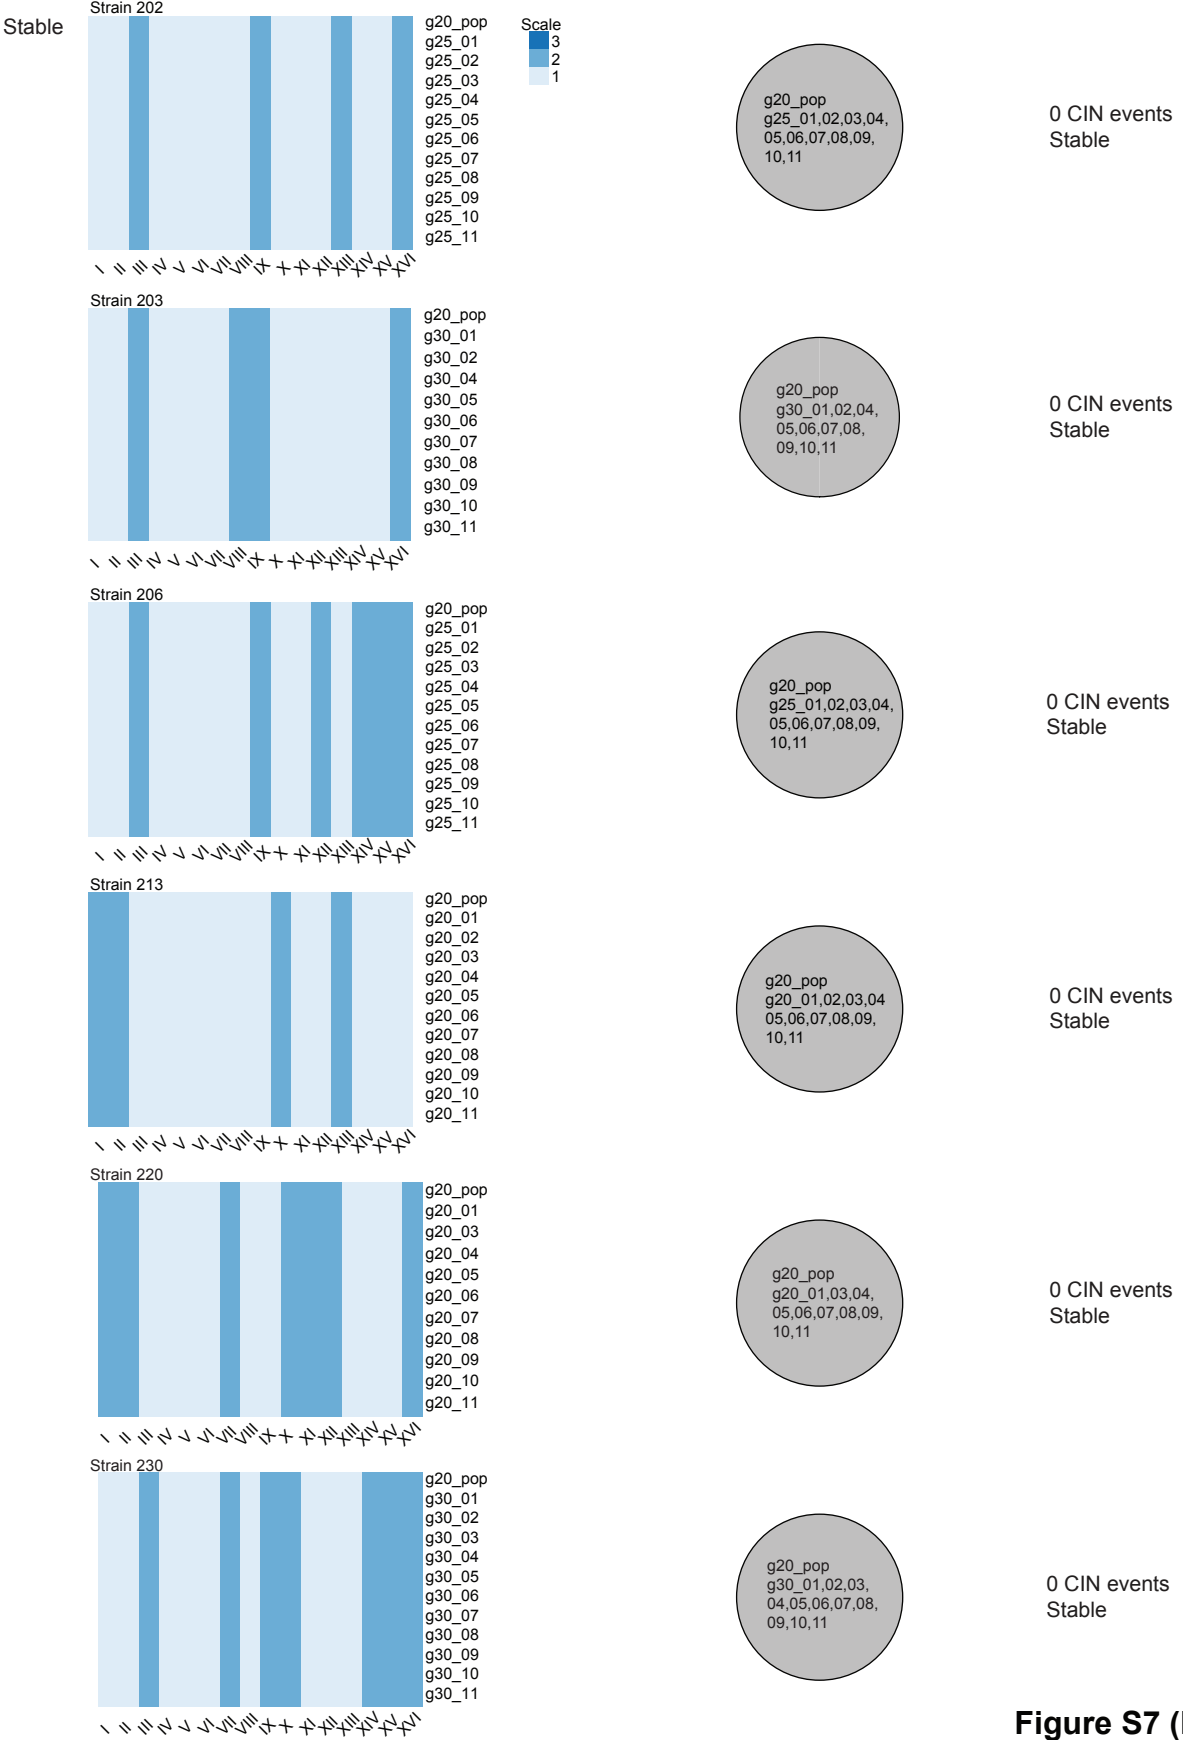

**Figure S7 (Page 1)**

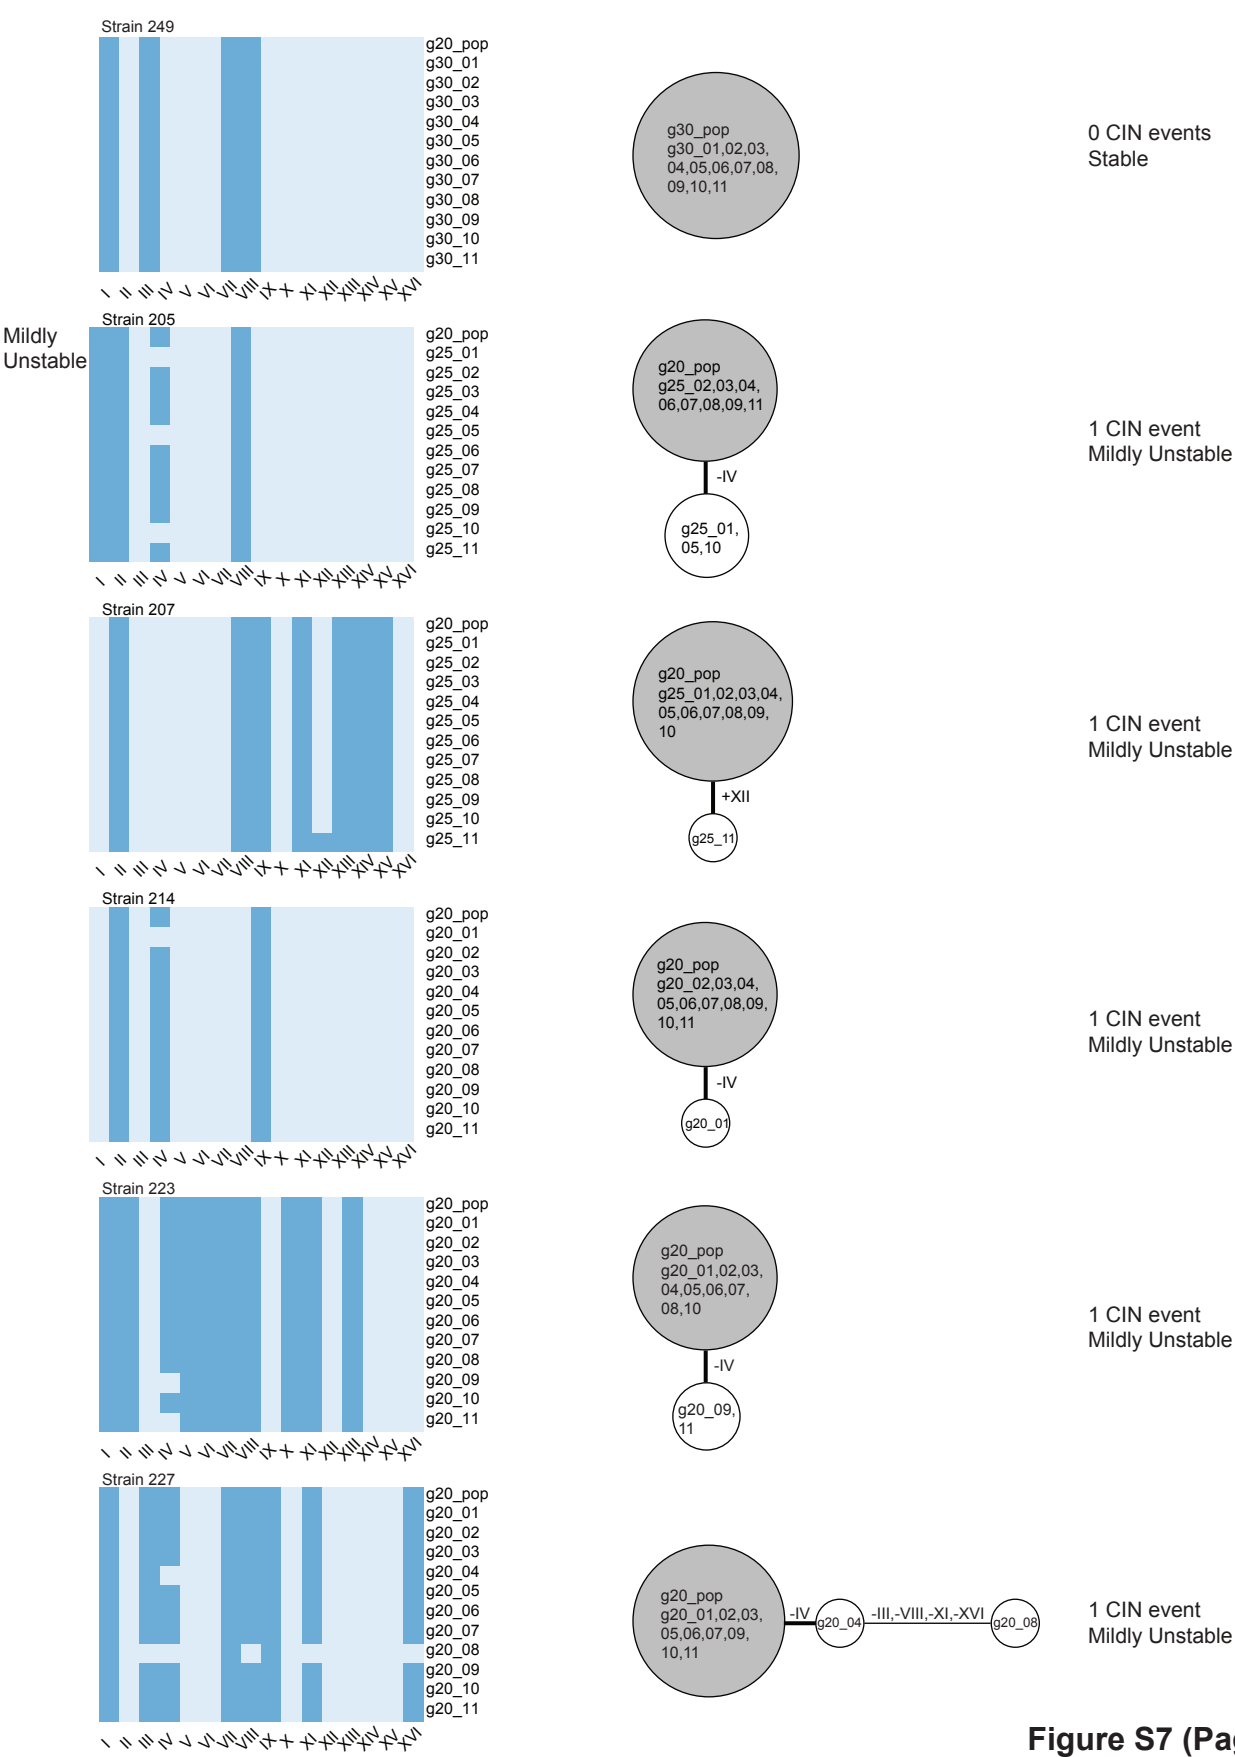

**Figure S7 (Page 2)**

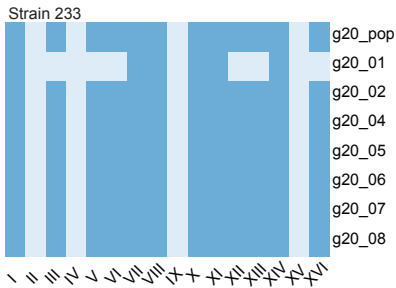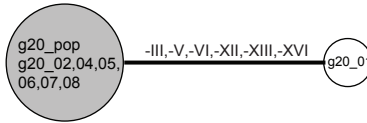

1 CIN event  
Mildly Unstable

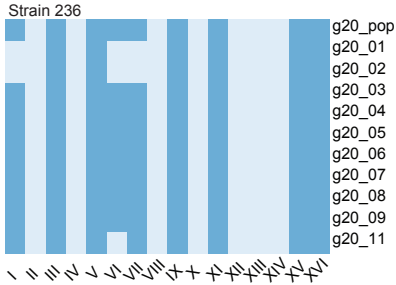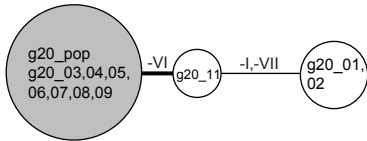

1 CIN event  
Mildly Unstable

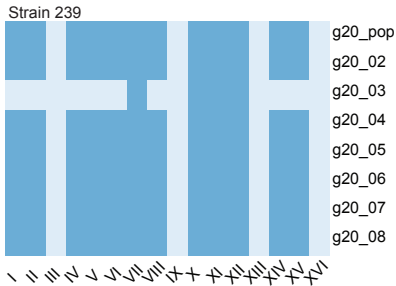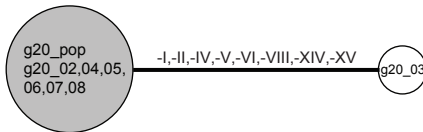

1 CIN event  
Mildly Unstable

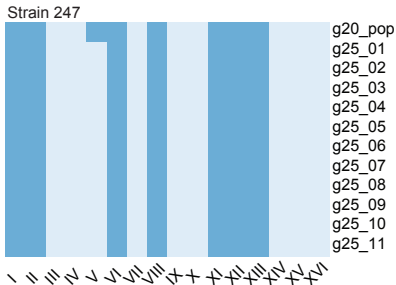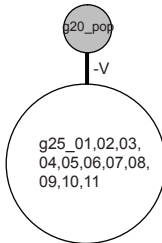

1 CIN event  
Mildly Unstable

Highly  
Unstable

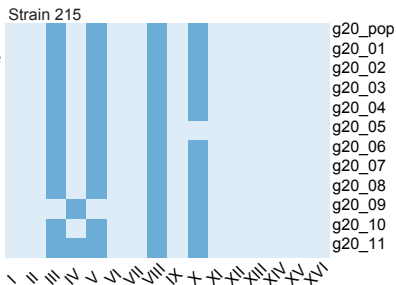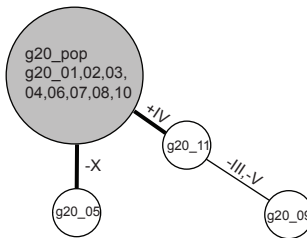

2 CIN events  
Highly Unstable

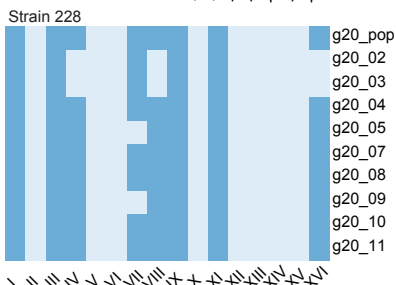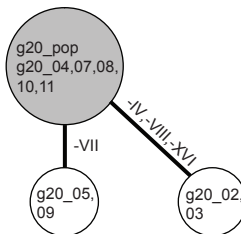

2 CIN events  
Highly Unstable

Figure S7 (Page 3)

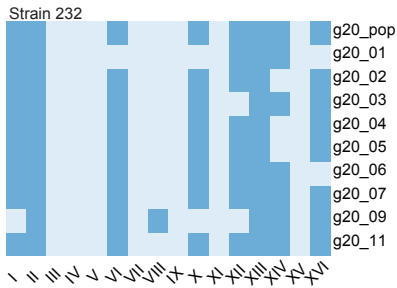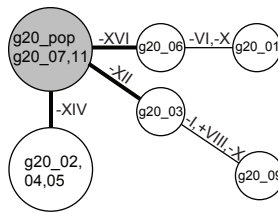

3 CIN events  
Highly Unstable

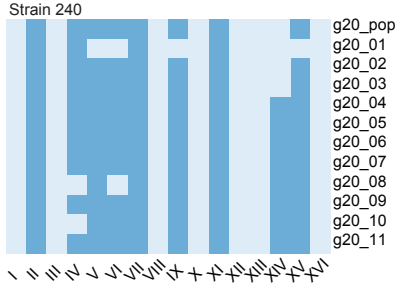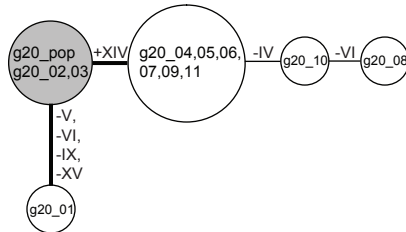

2 CIN events  
Highly Unstable

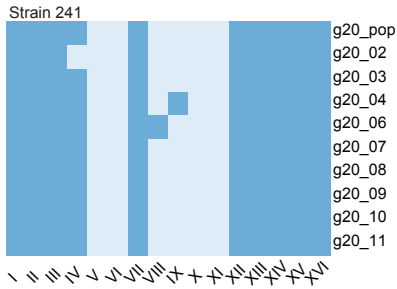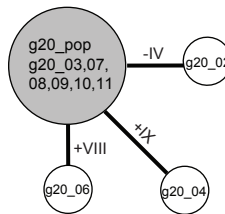

3 CIN events  
Highly Unstable

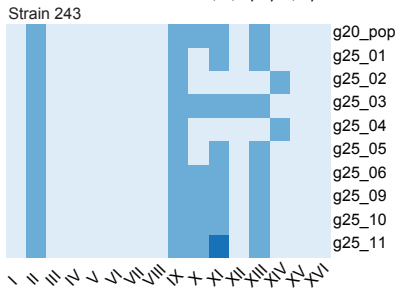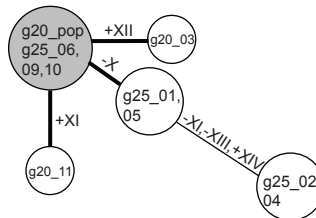

3 CIN events  
Highly Unstable

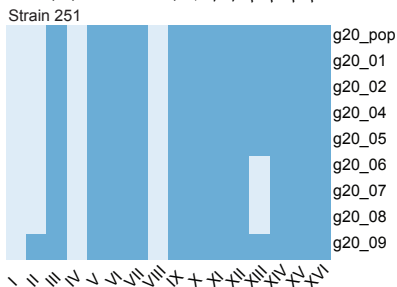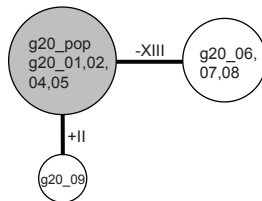

2 CIN events  
Highly Unstable

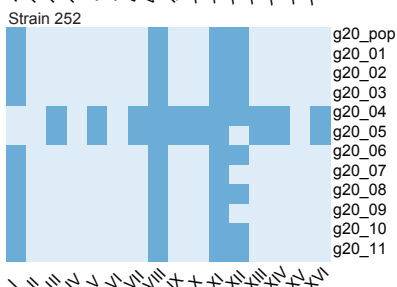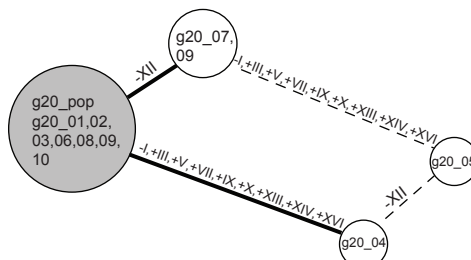

2 CIN events  
Highly Unstable
