# Supplementary material for: Karyotypic Determinants of Chromosome Instability in Aneuploid Budding Yeast
Source: PubMed Central journal article supplement (PMC3355078; doi:10.1371/journal.pgen.1002719), 2012-05-17
Supplement: pgen.1002719.s008.pdf [file pgen.1002719.s008.pdf]

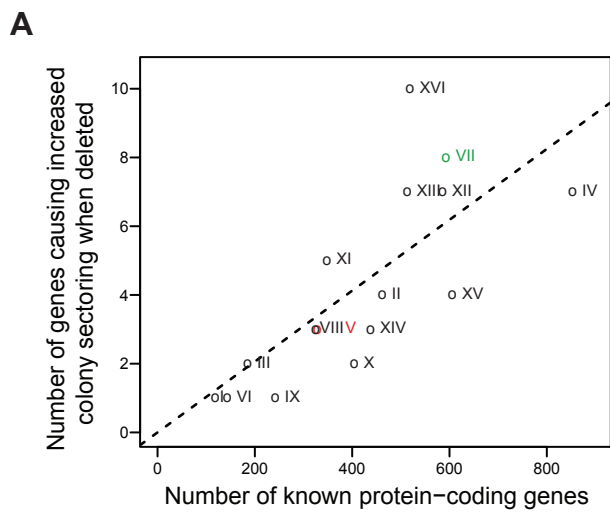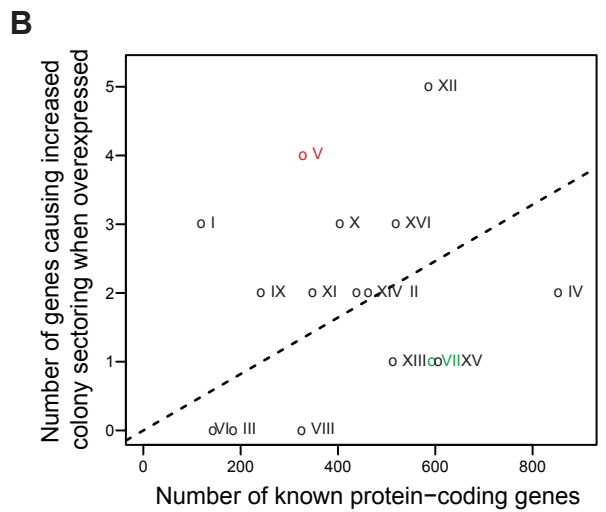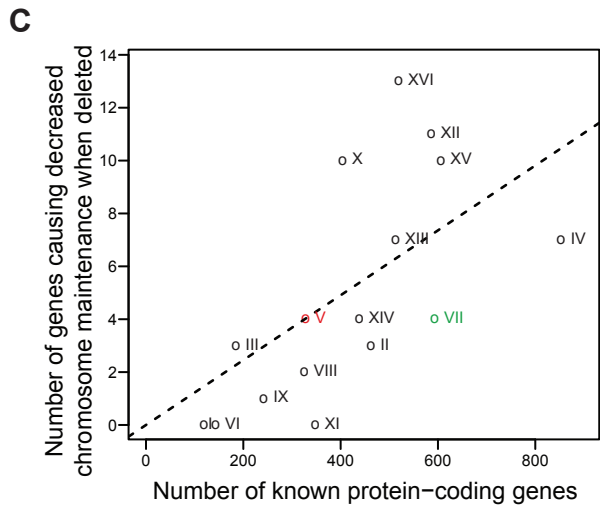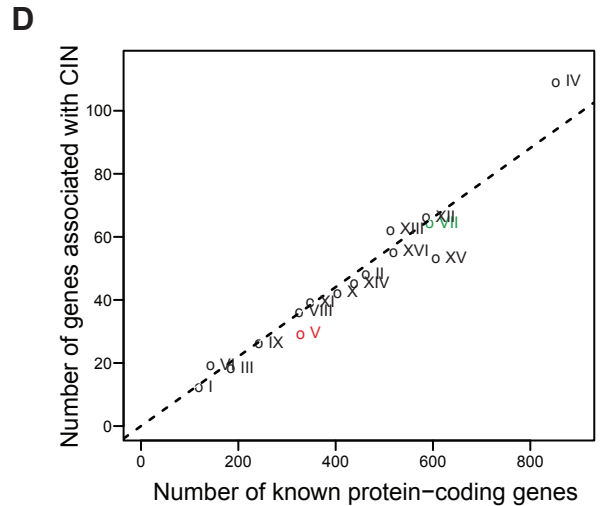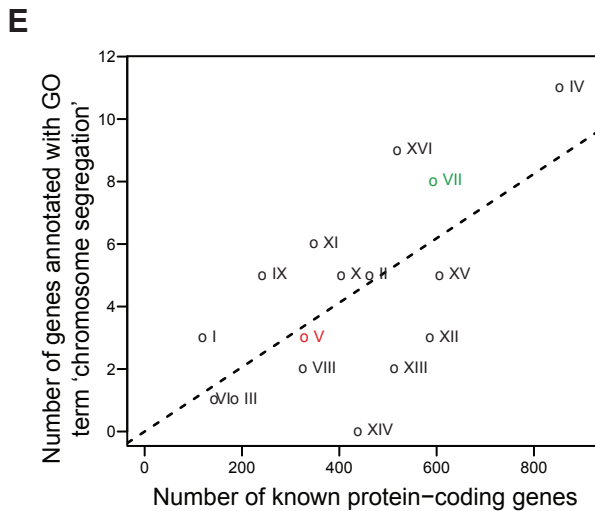

**Figure S8**
